# Supplementary material for: Role of mechanical deformation in the thermal transport of sI-type methane hydrate
Source: Royal Society of Chemistry journal article supplement (doi:10.1039/d1cp04189d), 2022-01-01
Supplement: d1cp04189d1.pdf [file d1cp04189d1.pdf]

## Supporting Information

### **Role of mechanical deformation on the thermal transport of sI-type methane hydrate**

Ke Xu<sup>a</sup>, Yanwen Lin<sup>a</sup>, Qiao Shi<sup>a</sup>, Tong Li<sup>b</sup>, Zhisen Zhang<sup>a</sup> and Jianyang Wu<sup>\*ac</sup>

<sup>a</sup> Department of Physics, Research Institute for Biomimetics and Soft Matter, Jiujiang Research Institute and Fujian Provincial Key Laboratory for Soft Functional Materials Research, Xiamen University, Xiamen 361005, PR China.

<sup>b</sup> Key Laboratory of Marine Materials and Related Technologies, Zhejiang Key Laboratory of Marine Materials and Protective Technologies, Ningbo Institute of Materials Technology and Engineering, Chinese Academy of Sciences, Ningbo 315201, PR China

<sup>c</sup> NTNU Nanomechanical Lab, Norwegian University of Science and Technology (NTNU), Trondheim 7491, Norway

\* E-mail: [jianyang@xmu.edu.cn](mailto:jianyang@xmu.edu.cn)

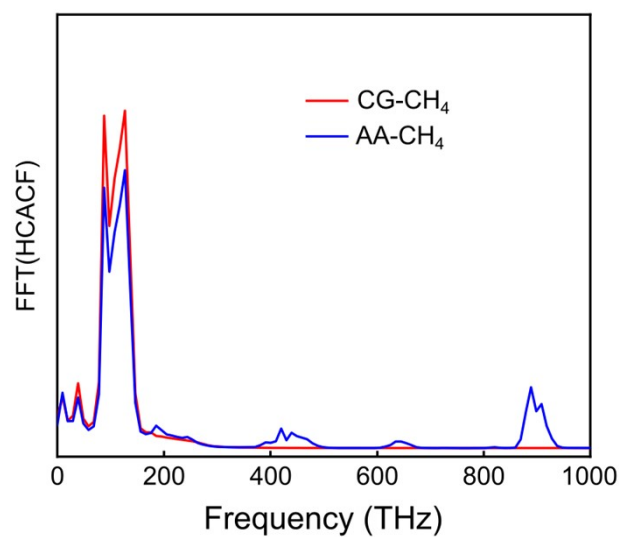

**Figure S1** Fast Fourier Transform (FFT) of HCACF of monocrystalline sI clathrate hydrate (AA: blue, CG: red).

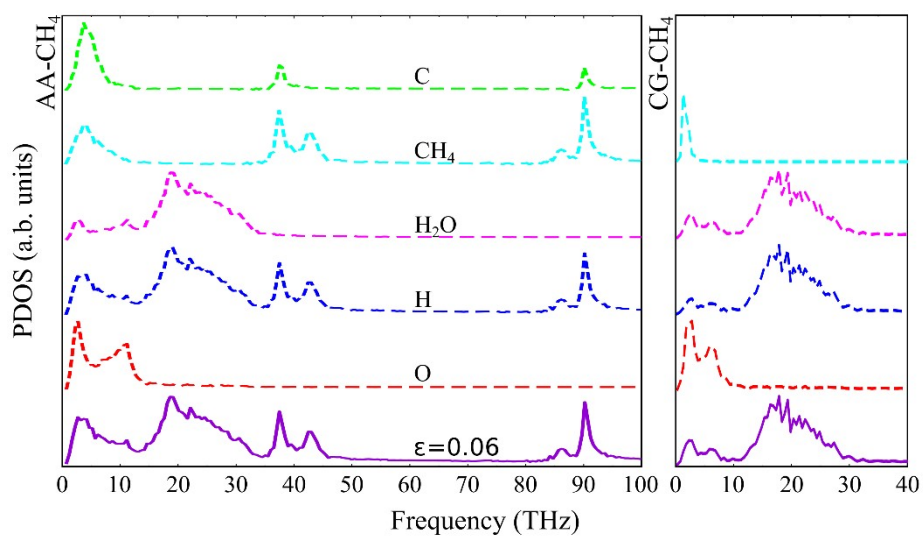

**Figure S2** PDOS of sI methane hydrate with (a) AA and (b) CG models of methane molecule at triaxial tension strain of 0.06.
